# Supplementary material
Source: PubMed Central journal article supplement (PMC7454827)

**Legends to Figures:**

Supplemental Figure 1. Flowchart with detailed criteria used in the ambulatory referral process.

**Supplemental Figure 1.**  
**Ambulatory Care Referral Process: Indicators for Referral for Evaluation**

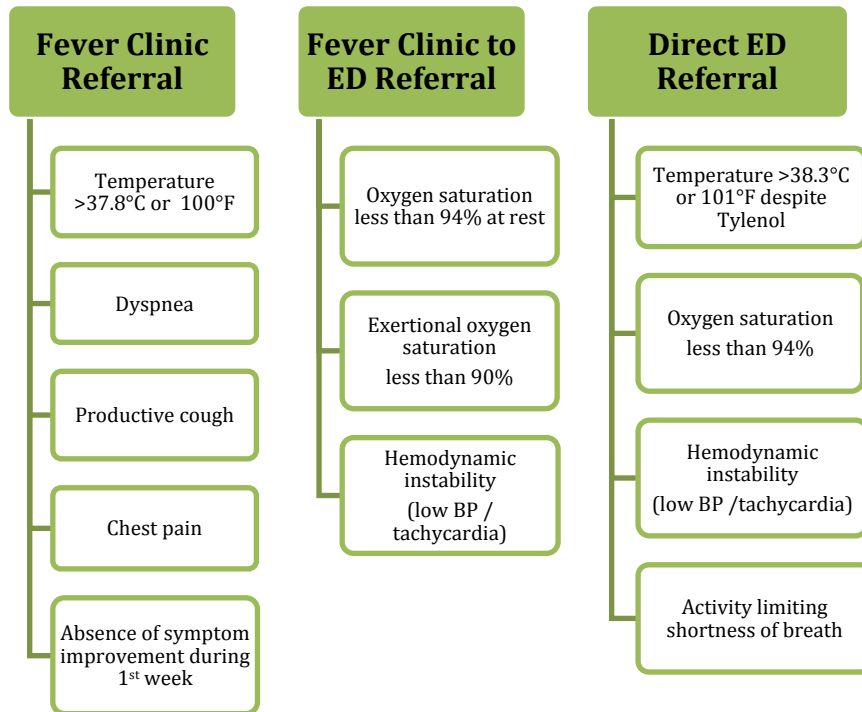

Supplement: gfaa154_supplementary_data.pdf [file gfaa154_supplementary_data.pdf]
